# CAR Macrophages for SARS-CoV-2 Immunotherapy

Wenyan Fu<sup>1,2,3,#</sup>, Changhai Lei<sup>1,2,#</sup>, Kewen Qian<sup>1,2</sup>, Zetong Ma<sup>1</sup>, Tian Li<sup>1,2</sup>, Fangxin Lin<sup>1</sup>, Wei Zhang<sup>4,5</sup>, Jian Zhao<sup>6</sup>, and Shi Hu<sup>1,2\*</sup>

<sup>1</sup> Department of Biophysics, College of Basic Medical Sciences, Second Military Medical University, Shanghai 200433, China.

<sup>2</sup> Team SMMU-China of the International Genetically Engineered Machine (iGEM) competition, Department of Biophysics, Second Military Medical University, Shanghai 200433, China.

<sup>3</sup> Department of Assisted Reproduction, Shanghai Ninth People's Hospital, Shanghai Jiao Tong University School of Medicine, Shanghai 200011, China.

<sup>4</sup> Department of Respiratory and Critical Care Medicine, First affiliated hospital, the Second Military Medical University, Shanghai 200433. China.

<sup>5</sup> Guanggu District, the Maternal and Child Health Hospital of Hubei Province, 430070 Wuhan, Hubei Province, China.

<sup>6</sup> KOCHKOR Biotech, Inc., Shanghai 202152, China

# These authors contributed equally to this work.

\*Corresponding Author: Shi Hu, Second Military Medical University, 800 Xiangyin Road, Shanghai 200433, China. Phone: +86-02181870925; E-mail: hus@smmu.edu.cn.

**Keywords: SARS-CoV-2, COVID19, CAR, Cell based therapy**

## 1 **Abstract**

2 Targeted therapeutics for the treatment of coronavirus disease 2019 (COVID-19), especially  
3 severe cases, are currently lacking. As macrophages have unique effector functions as a first-line  
4 defense against invading pathogens, we genetically armed human macrophages with chimeric  
5 antigen receptors (CARs) to reprogram their phagocytic activity against SARS-CoV-2. After  
6 investigation of CAR constructs with different intracellular receptor domains, we found that  
7 although cytosolic domains from MERTK ( $CAR_{MERTK}$ ) did not trigger antigen-specific cellular  
8 phagocytosis or killing effects, unlike those from MEGF10, FcR $\gamma$  and CD3 $\zeta$  did, these CARs all  
9 mediated similar SARS-CoV-2 clearance in vitro. Notably, we showed that  $CAR_{MERTK}$   
10 macrophages reduced the virion load without upregulation of proinflammatory cytokine expression.  
11 These results suggest that  $CAR_{MERTK}$  drives an ‘immunologically silent’ scavenger effect in  
12 macrophages and pave the way for further investigation of CARs for the treatment of individuals  
13 with COVID-19, particularly those with severe cases at a high risk of hyperinflammation.

14

15

16

## 1 **Introduction**

2 The coronavirus disease 2019 (COVID-19) pandemic has caused a sudden significant  
3 increase in hospitalizations for pneumonia with multiorgan disease and has led to more  
4 than 300,000 deaths worldwide. COVID-19 is caused by the novel severe acute respiratory  
5 syndrome coronavirus 2 (SARS-CoV-2), a novel enveloped RNA betacoronavirus.  
6 SARS-CoV-2 infection may be asymptomatic or cause a wide spectrum of symptoms,  
7 ranging from mild symptoms of upper respiratory tract infection to life-threatening sepsis.<sup>1</sup>  
8 Manifestations of COVID-19 include asymptomatic carriers and fulminant disease  
9 characterized by sepsis and acute respiratory failure. Approximately 5% of patients with  
10 COVID-19, including 20% of those hospitalized, experience severe symptoms  
11 necessitating intensive care. More than 75% of patients hospitalized with COVID-19  
12 require supplemental oxygen.<sup>1,2</sup> The case-fatality rate for COVID-19 varies markedly by  
13 age, ranging from 0.3 deaths per 1000 patients among patients aged 5 to 17 years to 304.9  
14 deaths per 1000 patients among patients aged 85 years or older. Among patients  
15 hospitalized in the intensive care unit, the case fatality can reach 40%.<sup>1</sup>

16 There is currently no human vaccine available for SARS-CoV-2, but approximately  
17 120 candidates are under development. In the development of an effective vaccine, a  
18 number of challenges must be overcome, such as technical barriers, the feasibility of  
19 large-scale production and regulation, legal barriers, the potential duration of immunity  
20 and thus the number of vaccine doses needed to confer immunity, and the  
21 antibody-dependent enhancement effect. Moreover, there is another complicated area to  
22 consider: drug development for COVID-19, especially treatments for patients with severe  
23 or late-stage disease. Dexamethasone therapy was reported to reduce 28-day mortality in  
24 patients requiring supplemental oxygen compared with usual care (21.6% vs 24.6%;  
25 age-adjusted rate ratio, 0.83 [95% CI, 0.74-0.92])<sup>3</sup>, and remdesivir was reported to  
26 improve the time to recovery (hospital discharge or no supplemental oxygen required)  
27 from 15 to 11 days.<sup>4</sup> In a randomized trial of 103 patients with COVID-19, convalescent  
28 plasma did not shorten the time to recovery<sup>5</sup>. Ongoing trials are testing antiviral therapies,  
29 immune modulators, and anticoagulants; however, there is no specific antiviral treatment  
30 recommended for COVID-19.

1 Chimeric antigen receptors (CARs) are synthetic receptors that redirect T cell activity  
2 towards specific targets<sup>6</sup>. A CAR construct includes antigen-recognition domains in the  
3 form of a single-chain variable fragment (scFv) or a binding receptor/ligand in the  
4 extracellular domains, a transmembrane domain providing the scaffold and signaling  
5 transduction, and intracellular domains from the T cell receptor (TCR) and costimulatory  
6 molecules that trigger T cell activation<sup>7</sup>. Based on the longstanding interest in harnessing  
7 macrophages to combat tumor growth<sup>8,9</sup>, human macrophages engineered with CARs have  
8 been developed and characterized for their antitumor potential. Macrophages, critical  
9 effectors of the innate immune system, are responsible for sensing and responding to  
10 microbial threats and promoting tissue repair. We therefore hypothesize that CAR  
11 macrophages can be used to combat SARS-CoV-2. However, the hyperinflammatory  
12 macrophage response, which has been found to be damaging to the host, particularly in  
13 severe infections, including SARS-CoV-2, and cytokine release syndrome (CRS), which is  
14 also the most significant complication associated with CAR-T cell therapy, raise questions  
15 regarding the safety of using CAR macrophages for virus clearance.

16 In this report, we developed a series of chimeric antigen receptors based on  
17 recognition of the S protein and tested their ability to induce phagocytosis of SARS-CoV-2  
18 virions. Interestingly, we reported that one CAR with the intracellular domain of MERTK,  
19 which belongs to the TAM receptor family, did not show a notable killing effect in  
20 antigen-expressing cell-based models compared with other CARs but did demonstrate  
21 antigen-specific clearance of SARS-CoV-2 virions in vitro without the secretion of  
22 proinflammatory cytokines.

## 23 **Results**

24 To program engulfment based on recognition of the SARS-CoV-2 spike protein, we  
25 used a CAR design for the synthetic receptor strategy in our study. The synthetic receptors  
26 were constructed to contain an scFv derived from an antibody recognizing the virus spike  
27 protein, CR3022, which has been reported to bind with the receptor-binding domain of the  
28 SARS-CoV-2 S glycoprotein with high affinity, and the CD8 transmembrane domain  
29 present in the  $\alpha$ CD19 CAR for T cells<sup>9</sup>. For the cytoplasmic domains, we used the  
30 common  $\gamma$  subunit of Fc receptors (CAR $\gamma$ ), MEGF10 (CAR<sub>MEGF10</sub>), MERTK (CAR<sub>MERTK</sub>)

1 and CD3 $\zeta$  (CAR $\zeta$ ) in our study (Fig. 1a). These cytoplasmic domains are capable of  
2 promoting phagocytosis by macrophages.

3 Next, we used lentiviral vector technology to express the fusion constructs in human  
4 macrophage THP-1 cells using clinically validated techniques<sup>10</sup>. The cDNA sequences  
5 containing the various fusion constructs were cloned into a third-generation lentiviral  
6 vector in which the CMV promoter was replaced with the EF-1 $\alpha$  promoter<sup>11</sup>. An  
7 extracellular MYC epitope was cloned into the receptors to permit detection by flow  
8 cytometry. Lentiviral vector supernatants transduced THP-1 cells with high efficiency (Fig.  
9 1b). The phagocytic potential of human macrophage THP-1 cell lines expressing different  
10 CAR receptors or a truncated CAR receptor (CAR $\Delta$ ) lacking the intracellular domain was  
11 measured with a cell-based assay. Consistent with previous reports<sup>8,9</sup>, CAR macrophages  
12 and control untransduced (UTD) macrophages did not show notable phagocytosis of 293  
13 cells; however, CAR<sub>MEGF10</sub>, CAR $\gamma$  and CAR $\zeta$  cells but not CAR<sub>MERTK</sub>, CAR $\Delta$ , or UTD  
14 macrophages phagocytosed Spike-bearing 293 cells in an S-specific manner (Fig. 1c).  
15 CAR-mediated macrophage phagocytosis was further confirmed by a luciferase-based  
16 killing assay, and our data showed that CAR<sub>MEGF10</sub>, CAR $\gamma$  and CAR $\zeta$  cells eradicated S  
17 protein-expressing 293T cells in an antigen-specific manner (Fig. 1d). Interestingly,  
18 CAR<sub>MERTK</sub> and UTD macrophages showed-no difference in killing effect. Our data further  
19 showed that all synthetic receptors had the ability to bind the S protein (Fig. 1e); therefore,  
20 the differences in phagocytosis and the lytic effect were not due to the affinity for the S  
21 protein.

22 Although there is currently no evidence that SARS-CoV-2 can infect THP-1 cells with  
23 or without IgGs<sup>12</sup>, THP-1 cells have been shown to support antibody-mediated  
24 enhancement of SARS-CoV infection in previous studies<sup>13</sup>. We therefore sought to  
25 determine whether synthetic receptors facilitate the entry of SARS-COV-2 into  
26 macrophages as host cells, as the extracellular domain of the CAR constructs has the  
27 capacity to directly bind to the S protein. Replication-defective VSV particles bearing  
28 coronavirus S proteins faithfully reflect key aspects of host cell entry by coronaviruses,  
29 including SARS-CoV-2<sup>14,15</sup>. We therefore employed VSV pseudotypes bearing SARS-2-S  
30 to study the cell entry of SARS-CoV-2. Our data showed that Vero E6 cells were  
31 susceptible to entry driven by SARS-S (Fig. 2a); however, no evidence of infection was

1 detected in THP-1 cells with or without synthetic receptors.

2 Antibody-mediated phagocytosis and internalization of virions are important  
3 mechanisms of antiviral activity performed by macrophages against pathogens; however,  
4 using the phagocytosis assay developed for SARS-CoV-2, we observed low levels of  
5 phagocytic activity when UTD cells directly contacted virions. Phagocytic activity was not  
6 significantly increased when CAR $\Delta$  cells rather than UTD macrophages were the  
7 phagocytes in the assay, suggesting that the extracellular domain of the CAR alone is not  
8 sufficient to induce strong virion internalization. CAR $\gamma$ , CAR<sub>MEGF10</sub>, and CAR $\zeta$  mediated  
9 similar significantly stronger levels of SARS-CoV-2 phagocytosis by THP-1 cells than  
10 CAR $\Delta$  (Fig 2b). Unexpectedly, we also observed strong internalization of virions in  
11 CAR<sub>MERTK</sub> cells, which did not show specific phagocytic or lytic effects on S  
12 protein-expressing 293T cells. Since all the CARs exhibited the ability to induce  
13 phagocytosis of SARS-CoV-2 virions while there was no evidence of infection, these  
14 experiments strongly suggest the clearance of SARS-CoV-2 virions of CAR macrophages.

15 Because the systemic cytokine profiles observed in patients with severe COVID-19  
16 show similarities to those observed in patients with macrophage activation syndrome,  
17 culture supernatants from THP-1 cells with different CARs treated with virions were  
18 further analyzed in a multiplex cytokine assay (Fig. 2c). Following SARS-CoV-2 treatment  
19 of THP-1 cells, we observed slightly increased secretion of the cytokines IL-6, IL-8 and  
20 TNF- $\alpha$ , but no discernable patterns could be confidently drawn for GM-CSF, IL-1 $\beta$ , IL-2,  
21 IL-4, IL-5, IL-8, IL-10, and IFN- $\gamma$ . CAR $\Delta$  cells showed a cytokine profile similar to that of  
22 UTD macrophages. Notably, we observed not only strongly increased induction of IL-6,  
23 IL-8 and TNF- $\alpha$  but also induction of IFN- $\gamma$  and IL-10 in SARS-CoV-2-treated CAR $\gamma$  and  
24 CAR $\zeta$  cells. However, for CAR<sub>MERTK</sub> cells, we did not observe significant changes in  
25 cytokines.

26 We further used a transwell-based coculture model to evaluate the protective role of  
27 CAR macrophages in SARS-CoV-2 infection (Fig. 3a). All the CAR-expressing  
28 macrophages potently inhibited Vero E6 cell infection with the SARS-CoV-2-S  
29 pseudotyped virus. Interestingly, CAR $\Delta$  cells showed no protective effect in the infection  
30 assay, although they had a similar capacity to bind to the S protein, suggesting that the  
31 intracellular signaling domain is necessary for virion clearance by CAR macrophages (Fig.

1 3b).

## 2 **Discussion**

3 Macrophages, which protect against infections and scavenge the body's worn-out or  
4 abnormal cells, are known for their phagocytic activity, antigen presentation capability, and  
5 flexible phenotype. The innate immune response of the pulmonary parenchyma, which is  
6 characterized by the differentiation of bone marrow-derived monocytes into macrophages,  
7 serves as a first-line defense against invading pathogens in the lungs<sup>16</sup>. In general,  
8 monocytes/macrophages are able to remarkably limit viral replication. The  
9 monocyte-enhanced proinflammatory signaling molecule levels and antiviral responses  
10 provoked during viral infection have been shown for influenza, herpes, and Zika viruses<sup>17</sup>.  
11 Moreover, it has recently been suggested that some COVID-19 patients have enhanced  
12 proinflammatory macrophage activity, which leads to accelerated production of  
13 inflammatory cytokines and chemokines and has mostly been observed in subjects with a  
14 poor prognosis<sup>18</sup>.

15 To our knowledge, no synthetic cell-based immunotherapy has been investigated for  
16 COVID-19. CAR-expressing T cells have been demonstrated to be a very effective  
17 approach to treat B-cell cancer patients. Harnessing the power of engineered macrophages  
18 for the development of novel treatments for solid tumors is of great interest because  
19 CAR-T cell therapy is often hampered by the inability of T cells to penetrate solid tumors  
20 and the inhibitory tumor microenvironment<sup>19</sup>. Consistent with a previous report<sup>8</sup>, CAR  
21 receptors with cytosolic immunoreceptor tyrosine-based activation motifs (ITAMs) were  
22 capable of triggering specific engulfment and killing of antigen-expressing cells by  
23 macrophages. These CAR macrophages also showed strong phagocytosis of SARS-COV-2  
24 virions in our data; however, this effect was accompanied by increased secretion of the  
25 proinflammatory cytokines IFN- $\gamma$ , IL-6, and IL-8. In CAR-T cell therapy, engineered T cell  
26 expansion is usually accompanied by high-grade CRS with elevated circulating levels of  
27 interferon (IFN)- $\gamma$ , granulocyte-colony stimulating factor (G-CSF), IL-6, IL-8 and IL-10.  
28 Recent reports have demonstrated that host-derived monocyte/macrophage and CAR-T  
29 cell interactions play an important role in CRS pathophysiology<sup>20</sup>. This is of interest  
30 because increased serum levels of similar inflammatory cytokines<sup>21-23</sup> have been



1 associated with COVID-19 severity and death. Interestingly, the secretion of IL-6, IL-8,  
2 TNF- $\alpha$ , IFN- $\gamma$  and IL-10 was significantly elevated in CAR $\gamma$  and CAR $\zeta$  cells treated with  
3 SARS-CoV-2 virions, suggesting that these CAR macrophages may not be suitable for  
4 application in severe patients or patients with late-stage COVID-19.

5 Previous studies have shown that human immune cells, such as THP-1 cell lines, are  
6 susceptible to SARS-CoV infection<sup>24</sup>. We did not observe any evidence that our  
7 SARS-CoV-2 pseudotyped virus infected THP-1 cells. Moreover, the uptake of virions by  
8 THP-1 cells was very low, even with a truncated CAR with the ability to bind to the S  
9 protein, suggesting that THP-1 cells did not innately engulf the virions. Notably,  
10 CAR<sub>MERTK</sub>, which was regarded as an unsuccessful receptor in a previous report<sup>8</sup> and  
11 showed no cellular killing effect on target cells when expressed in THP-1 cells in our assay,  
12 demonstrated a virion clearance capacity similar to that of CAR $\gamma$  and CAR $\zeta$ . Our data  
13 further support that CAR<sub>MERTK</sub> mediates ‘immunologically silent’ virion removal, which  
14 does not elicit a proinflammatory response.

15 MER tyrosine kinase (MERTK), together with TRYO3 and AXL, belongs to the TAM  
16 family of receptor tyrosine kinases (RTKs). These receptors can be activated by a complex  
17 ligand consisting of phosphatidylserine (PtdSer) linked to the RTK by a vitamin  
18 K-dependent protein ligand, Gas6, or Protein S<sup>25</sup>, playing a crucial role in innate immune  
19 cells. Gas6 has the capacity to bind all three receptors, while Protein S is a specific ligand  
20 of MERTK and TYRO3<sup>26</sup>. Apoptotic cells, exosomes, and cell debris are the main sources  
21 of the PtdSer component. In some cases, the PtdSer component is also provided by patches  
22 of exposed PtdSer on living cells (including T cells)<sup>25</sup>. The activation of members of the  
23 TAM family of receptors generally induces an anti-inflammatory, homeostatic response in  
24 innate immune cells, diminishing excessive inflammation and autoimmune responses  
25 elicited by the ingestion of “self”<sup>25</sup>. However, previous studies also proposed that  
26 enveloped viruses may hijack TAM receptors to facilitate attachment and infection via a  
27 PtdSer-dependent process termed “apoptotic mimicry” and act as potent TAM agonists, in  
28 turn inhibiting the type I IFN response in target cells<sup>27</sup>. In our study, THP-1 cells  
29 expressing the synthetic receptor with the MERTK cytoplasmic domain were relatively  
30 resistant to virus infection but induced notable virion clearance. It should be noted that our  
31 study used very simple infection models; therefore, the assays lack numerous physiological



1 and pathological factors, such as IgG or complement-mediated immune complexes, that  
2 may interfere with the behavior of engineered cells. Of course, cells expressing synthetic  
3 receptors can be further engineered and developed to achieve precise control.

4 In summary, our data reveal that the CAR-based synthetic approach is applicable for  
5 COVID-19 treatment. In addition to direct virion clearance by CAR macrophages, we  
6 found evidence that MERTK-based CAR receptors did not induce further upregulation of  
7 proinflammatory cytokine levels, thereby raising the possibility that CAR macrophages  
8 may be useful as potent therapeutics in severe COVID-19.

9

## 10 **Methods**

### 11 **Cell lines**

12 All cell lines were purchased from the American Type Culture Collection (ATCC;  
13 Manassas, VA). The identities of the cell lines were verified by STR analysis, and the cell  
14 lines were confirmed to be mycoplasma free. 293 and Vero cells were maintained in  
15 DMEM supplemented with 10% fetal bovine serum, and THP-1 cells were maintained in  
16 RPMI medium supplemented with 10% fetal bovine serum. Cell culture media and  
17 supplements were obtained from Life Technologies, Inc.

18

### 19 **Vector construction**

20 The sequence encoding the scFv generated from CR3022 was chemically synthesized.  
21 As shown in Fig. 1a, synthetic receptors contained the human CD8 $\alpha$  signal peptide  
22 followed by the scFv linked in-frame to the hinge domain of the CD8 $\alpha$  molecule,  
23 transmembrane region of the human CD8 molecule, and intracellular signaling domains of  
24 the FCER1G, MEGF10, MERTK or CD3 $\zeta$  molecules. The fragments were subcloned into  
25 the pELNS vector<sup>28</sup>. High-titer replication-defective lentiviruses were produced and  
26 concentrated<sup>28</sup>. Lentiviral infection was used to stably express CAR constructs in THP-1  
27 cells.

### 28 **FACS-based phagocytosis assay**

29 UTD or CAR-expressing THP-1 cells were cocultured with GFP<sup>+</sup> 293T cells or GFP<sup>+</sup>  
30 293T-S (S<sup>+</sup>) target cells for 4 h at 37 °C. The effector-to-target (E:T) ratio was 1:1, and 1 ×

1  $10^5$  cells were used as both effector cells and target cells. After coculturing, the cells were  
2 harvested and stained with an anti-CD11b APC-Cy7-conjugated antibody (M1/70,  
3 BioLegend) and analyzed by FACS using a FACSCalibur flow cytometer (BD  
4 Biosciences). The percentage of phagocytosis was calculated based on the percent of GFP<sup>+</sup>  
5 events within the CD11b<sup>+</sup> population. Data are represented as the mean  $\pm$  standard error of  
6 quadruplicate wells.

### 7 **Flow cytometry**

8 Cell-surface staining was performed for 45 min at 4 °C and was analyzed using a  
9 FACSCalibur flow cytometer (BD Biosciences). A minimum of  $1 \times 10^4$  events per sample  
10 were examined.

### 11 **In vitro cytotoxicity assay**

12 293T and 293T-S cells were used as targets in luciferase-based killing assays including  
13 control (UTD) or CAR macrophages. The effector-to-target (E:T) ratio was 10:1 for all the  
14 groups. Bioluminescence was measured using a Bio-Tek Synergy H1 microplate reader.  
15 The percent specific lysis was calculated on the basis of the experimental luciferase signal  
16 (total flux) relative to the signal of the target alone, using the following formula: %Specific  
17 Lysis = [(Sample signal - Target alone signal)] / [Background signal - Target alone  
18 signal]  $\times$  100.

### 19 **SARS-CoV-2 pseudovirus and cell infection experiments**

20 The SARS-CoV-2 pseudovirus was constructed based on the spike genes of the strain  
21 Wuhan-Hu-1 (GenBank: MN908947) using published methods<sup>29</sup>. The SARS-CoV-2 spike  
22 gene was chemically synthesized and cloned into a eukaryotic expression plasmid. 293T  
23 cells were first transfected with the S expression vector and then infected with a VSV  
24 pseudotyped virus (G\* $\Delta$ G-VSV), in which the VSV-G gene was substituted with luciferase  
25 expression cassettes. The culture supernatants were harvested and filtered at 24 h  
26 postinfection. The SARS-CoV-2 pseudovirus could not be neutralized with anti-VSV-G  
27 antibodies, and no G\* $\Delta$ G-VSV was mixed with the SARS-CoV-2 pseudovirus stock. For  
28 cell-based infection assays, target cells were grown in plates until they reached 50%–75%  
29 confluency and then were inoculated with pseudotyped virus. The transduction efficiency  
30 was quantified at 16 h posttransduction by measuring firefly luciferase activity according  
31 to the manufacturer's instructions (Promega).

1 **Phagocytosis assay**

2 In all cases, SARS-CoV-2 S pseudotyped virions were pelleted (90 min at 14,000 rpm  
3 and 4 °C), and after removal of the supernatant, the pellets were resuspended in RPMI  
4 medium and incubated with phagocytes (THP-1 cells or CAR macrophages) at 37 °C for  
5 1.5 h. After allowing time for phagocytosis, the cells were washed three times with PBS  
6 and incubated with Accutase (Innovative Cell Technologies) for 10 min at 37 °C, followed  
7 by a final wash in Accutase. Intracellular staining for the S protein was performed for 60  
8 min on ice after using a fixation/permeabilization kit (eBioscience) and then analyzed  
9 using a FACSCalibur flow cytometer (BD Biosciences). The phagocytic score was  
10 determined by gating the samples on events representing cells and was calculated as  
11 follows: Percent S protein positive × median fluorescence intensity (MFI).

12 **Cytokine analysis**

13 Cytokine analysis was performed on supernatants derived from cultures given the  
14 indicated treatments using a human cytokine 10-plex panel (Thermo Scientific) per the  
15 manufacturer's instructions, with the panel results read on a Luminex Analyzer.

16 **Statistical analysis.**

17 Unless otherwise specified, Student's t test was used to evaluate the significance of  
18 differences between two groups, and ANOVA was used to evaluate differences among  
19 three or more groups. Differences between samples were considered statistically  
20 significant when  $P < 0.05$ .

21  
22  
23  
24  
25  
26  
27  
28  
29  
30

## 1   **References**

- 2   1    Wiersinga, W. J., Rhodes, A., Cheng, A. C., Peacock, S. J. & Prescott, H. C. Pathophysiology,  
3        Transmission, Diagnosis, and Treatment of Coronavirus Disease 2019 (COVID-19): A Review.  
4        *JAMA*, doi:10.1001/jama.2020.12839 (2020).
- 5   2    Garg, S. *et al.* Hospitalization Rates and Characteristics of Patients Hospitalized with  
6        Laboratory-Confirmed Coronavirus Disease 2019 - COVID-NET, 14 States, March 1-30, 2020.  
7        *MMWR Morb Mortal Wkly Rep* **69**, 458-464, doi:10.15585/mmwr.mm6915e3 (2020).
- 8   3    Horby, P. *et al.* Effect of Dexamethasone in Hospitalized Patients with COVID-19: Preliminary  
9        Report. *medRxiv*, 2020.2006.2022.20137273, doi:10.1101/2020.06.22.20137273 (2020).
- 10  4    Beigel, J. H. *et al.* Remdesivir for the Treatment of Covid-19 - Preliminary Report. *N Engl J Med*,  
11        doi:10.1056/NEJMoa2007764 (2020).
- 12  5    Wang, W. *et al.* Detection of SARS-CoV-2 in Different Types of Clinical Specimens. *JAMA*,  
13        doi:10.1001/jama.2020.3786 (2020).
- 14  6    June, C. H., O'Connor, R. S., Kawalekar, O. U., Ghassemi, S. & Milone, M. C. CAR T cell  
15        immunotherapy for human cancer. *Science* **359**, 1361-1365, doi:10.1126/science.aar6711 (2018).
- 16  7    Fesnak, A. D., June, C. H. & Levine, B. L. Engineered T cells: the promise and challenges of cancer  
17        immunotherapy. *Nature Reviews Cancer* **16**, 566-581 (2016).
- 18  8    Morrissey, M. A. *et al.* Chimeric antigen receptors that trigger phagocytosis. *Elife* **7**, e36688 (2018).
- 19  9    Klichinsky, M. *et al.* Human chimeric antigen receptor macrophages for cancer immunotherapy.  
20        *Nature Biotechnology*, 1-7 (2020).
- 21  10   Levine, B. L. *et al.* Gene transfer in humans using a conditionally replicating lentiviral vector.  
22        *Proceedings of the National Academy of Sciences* **103**, 17372-17377 (2006).
- 23  11   Fu, W. *et al.* CAR exosomes derived from effector CAR-T cells have potent antitumour effects and  
24        low toxicity. *Nature communications* **10**, 1-12 (2019).
- 25  12   Banerjee, A. *et al.* Isolation, Sequence, Infectivity, and Replication Kinetics of Severe Acute  
26        Respiratory Syndrome Coronavirus 2. **26** (2020).
- 27  13   Jaume, M. *et al.* Anti-severe acute respiratory syndrome coronavirus spike antibodies trigger  
28        infection of human immune cells via a pH- and cysteine protease-independent FcγR pathway.  
29        *Journal of virology* **85**, 10582-10597, doi:10.1128/JVI.00671-11 (2011).
- 30  14   Kleine-Weber, H. *et al.* Mutations in the spike protein of Middle East respiratory syndrome  
31        coronavirus transmitted in Korea increase resistance to antibody-mediated neutralization. **93**  
32        (2019).
- 33  15   Hoffmann, M. *et al.* SARS-CoV-2 cell entry depends on ACE2 and TMPRSS2 and is blocked by a  
34        clinically proven protease inhibitor. (2020).
- 35  16   Abassi, Z., Knaney, Y., Karram, T. & Heyman, S. N. The Lung Macrophage in SARS-CoV-2  
36        Infection: A Friend or a Foe? *Frontiers in Immunology* **11**, 1312 (2020).
- 37  17   Nikitina, E., Larionova, I., Choinzonov, E. & Kzhyshkowska, J. Monocytes and Macrophages as  
38        Viral Targets and Reservoirs. *International journal of molecular sciences* **19**,  
39        doi:10.3390/ijms19092821 (2018).
- 40  18   Vaninov, N. In the eye of the COVID-19 cytokine storm. *Nature reviews. Immunology* **20**, 277,  
41        doi:10.1038/s41577-020-0305-6 (2020).
- 42  19   Ritchie, D. *et al.* In vivo tracking of macrophage activated killer cells to sites of metastatic ovarian  
43        carcinoma. *Cancer Immunol Immunother* **56**, 155-163 (2007).
- 44  20   Giavridis, T. *et al.* CAR T cell-induced cytokine release syndrome is mediated by macrophages and  
45        abated by IL-1 blockade. *Nat Med* **24**, 731-738, doi:10.1038/s41591-018-0041-7 (2018).
- 46  21   Huang, C. *et al.* Clinical features of patients infected with 2019 novel coronavirus in Wuhan, China.  
47        *The lancet* **395**, 497-506 (2020).
- 48  22   Chen, G. *et al.* Clinical and immunological features of severe and moderate coronavirus disease  
49        2019. *The Journal of clinical investigation* **130** (2020).
- 50  23   Merad, M. & Martin, J. C. Pathological inflammation in patients with COVID-19: a key role for  
51        monocytes and macrophages. *Nature Reviews Immunology*, 1-8 (2020).
- 52  24   Yen, Y. T. *et al.* Modeling the early events of severe acute respiratory syndrome coronavirus  
53        infection in vitro. *Journal of virology* **80**, 2684-2693, doi:10.1128/jvi.80.6.2684-2693.2006 (2006).
- 54  25   Graham, D. K., DeRyckere, D., Davies, K. D. & Earp, H. S. J. N. r. C. The TAM family:

1 phosphatidylserine-sensing receptor tyrosine kinases gone awry in cancer. **14**, 769-785 (2014).  
2 26 Tsou, W.-I. *et al.* Receptor tyrosine kinases, TYRO3, AXL, and MER, demonstrate distinct patterns  
3 and complex regulation of ligand-induced activation. **289**, 25750-25763 (2014).  
4 27 Moller-Tank, S. & Maury, W. J. V. Phosphatidylserine receptors: enhancers of enveloped virus entry  
5 and infection. **468**, 565-580 (2014).  
6 28 Carpenito, C. *et al.* Control of large, established tumor xenografts with genetically retargeted human  
7 T cells containing CD28 and CD137 domains. **106**, 3360-3365 (2009).  
8 29 Nie, J. *et al.* Establishment and validation of a pseudovirus neutralization assay for SARS-CoV-2.  
9 **9**, 680-686 (2020).  
10

## 11 **End Notes**

## 12 **Acknowledgements**

13 This study was supported by the National Natural Science Foundation of China (grant nos.  
14 82041012, 81773261, 31970882, 81903140 and 81602690); the Shanghai Rising-Star  
15 Program (grant no. 19QA1411400); and the Shanghai Sailing Program (19YF1438600).  
16

17 Competing Interests: the authors declare the following competing interests: J.Z. is a  
18 shareholder at KOCHKOR Biotech, Inc., Shanghai. W.F., J.Z. and S.H. are inventors on  
19 intellectual property related to this work. No potential conflicts of interest were disclosed  
20 by the other authors.  
21

## 22 **Figure Legends**

23 **Figure 1. Generation and characterization of CAR macrophages. a**, Vector maps of  
24 tested CAR designs and schematics showing the structures of CARs used in the study.  
25 Figure created with BioRender. **b**, Membrane-bound CAR expression. Forty-eight hours  
26 after retroviral transduction, the expression of synthetic receptors on THP-1 cells was  
27 detected by staining with an anti-MYC antibody, followed by flow cytometry analysis.  
28 Untransduced THP-1 cells were used as a negative control. The histograms shown in black  
29 correspond to the isotype controls, whereas the red histograms indicate positive  
30 fluorescence. **c**, FACS-based phagocytosis of 293T cells or 293T-S target cells by UTD or  
31 different CAR macrophages. Statistical significance was calculated with one-way ANOVA  
32 with multiple comparisons, and data represent n = 3 technical replicates (representative of  
33 at least three individual experiments). **d**, Killing of 293T or 293T-S cells by UTD or anti-S  
34 CAR macrophages at 24 h assessed with a luciferase-based assay. **e**. Flow cytometry  
35 analyses of CAR macrophages stained with a biotinylated S protein followed by  
36 streptavidin-FITC. The histograms shown in black correspond to the use of isotype

1 controls with streptavidin-FITC, whereas the red histograms indicate positive fluorescence.  
2 The results shown represent three (b) independent experiments. Data are the shown as the  
3 mean  $\pm$  s.d. of four independent biological replicates (c, d, e). P values were derived by  
4 one-way ANOVA followed by Tukey's posttest (c, d, e). \* $p < 0.05$ , \*\* $p < 0.01$ , \*\*\* $p < 0.001$ ,  
5 \*\*\*\* $p < 0.0001$ .

6 **Figure 2. CARs mediate phagocytosis of SARS-CoV-2 virions.** **a**, Different cell lines  
7 were inoculated with a SARS-CoV-2 pseudotyped virus. At 16 h postinoculation,  
8 pseudotyped virus entry was analyzed by determining the luciferase activity in cell lysates.  
9 Signals obtained for particles bearing no envelope protein were used for normalization.  
10 The average of three independent experiments is shown. Error bars indicate the SEM. **b**,  
11 The uptake of pseudotyped virions by UTD and CAR macrophages was analyzed by flow  
12 cytometry. Different cell lines were stained with an anti-S primary Ab. The histograms  
13 shown in black correspond to the isotype controls, whereas the red histograms indicate  
14 positive fluorescence. Data are reported as the phagocytic score (% positive cells  $\times$  MFI,  
15 right panel). **c**, Cell lines were infected with the SARS-CoV-2 pseudotyped virus or mock  
16 infected. Cytokine levels in the supernatants were determined by a multiplex bead array.  
17 The relative level was calculated as the ratio of the infected cells to the mock-infected  
18 THP-1 cells. Data are shown as the mean  $\pm$  s.d. (a–c) of four independent biological  
19 replicates. P values were derived by one-way ANOVA followed by Tukey's posttest (a–b)  
20 or two-way ANOVA followed by the Bonferroni posttest (c); \* $p < 0.05$ , \*\* $p < 0.01$ ,  
21 \*\*\* $p < 0.001$ , \*\*\*\* $p < 0.0001$ .

22 **Figure 3. CARs mediate protection against SARS-CoV-2 infection.** **a**, The schematic  
23 shows the transwell coculture model. Figure created with BioRender. **b**, Different cell  
24 cocultures were inoculated with the SARS-CoV-2 pseudotyped virus in the culture plate.  
25 At 16 h postinoculation, pseudotyped virus entry was analyzed by determining the  
26 luciferase activity in cell lysates. Signals obtained for particles bearing no envelope protein  
27 were used for normalization. Data are presented as the mean  $\pm$  s.d. (a–c) of four  
28 independent biological replicates. P values were derived by one-way ANOVA followed by  
29 Tukey's posttest. \* $p < 0.05$ , \*\* $p < 0.01$ , \*\*\* $p < 0.001$ , \*\*\*\* $p < 0.0001$ .

**Figure 1**

**a**

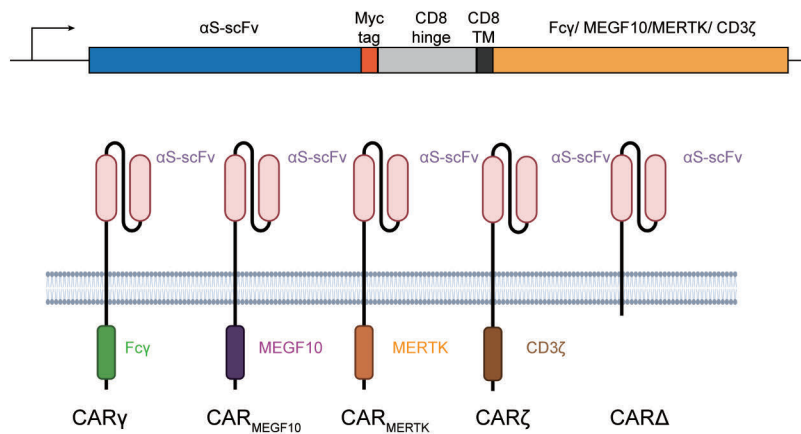

**b**

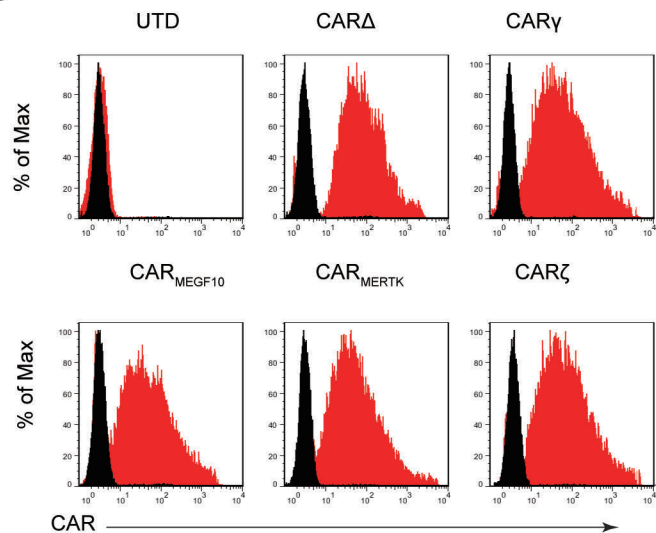

**c**

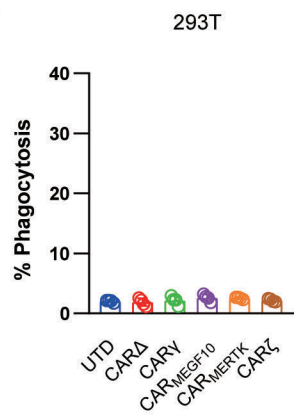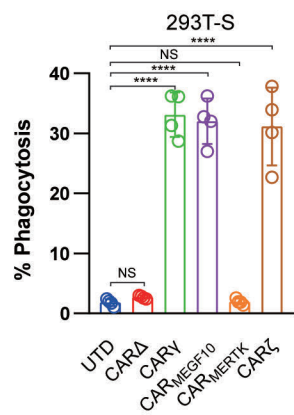

**d**

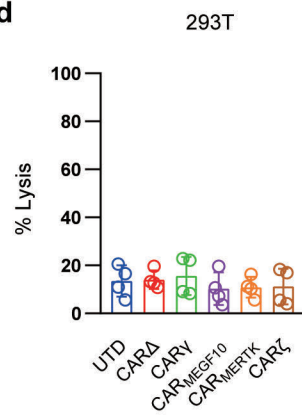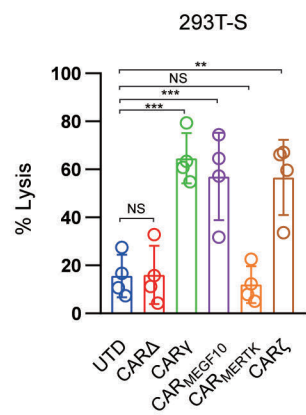

**e**

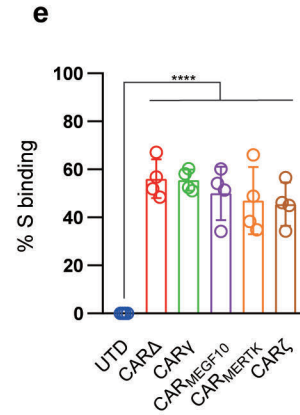



**Figure 2**

**a**

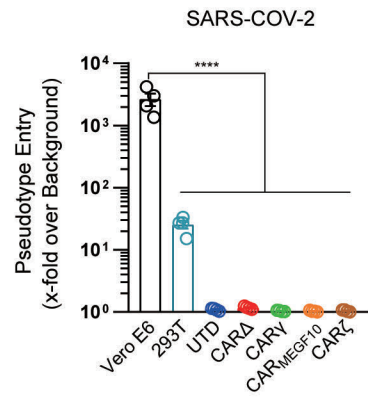

**b**

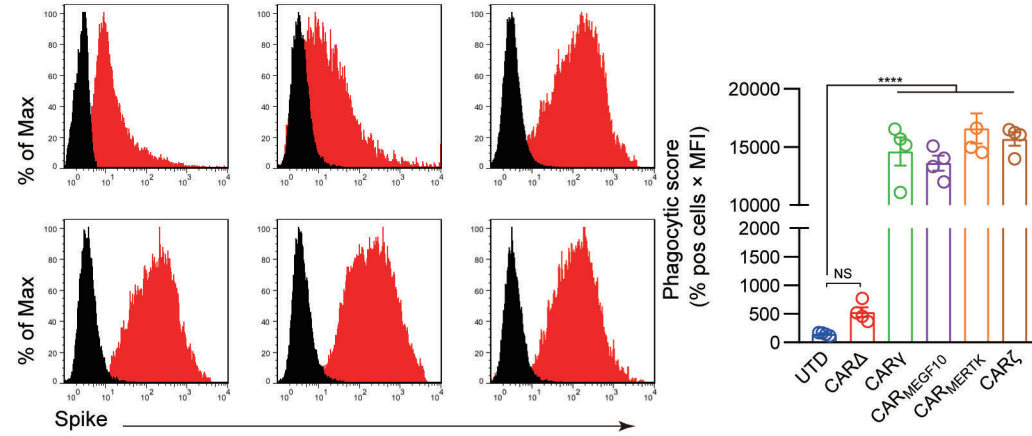

**c**

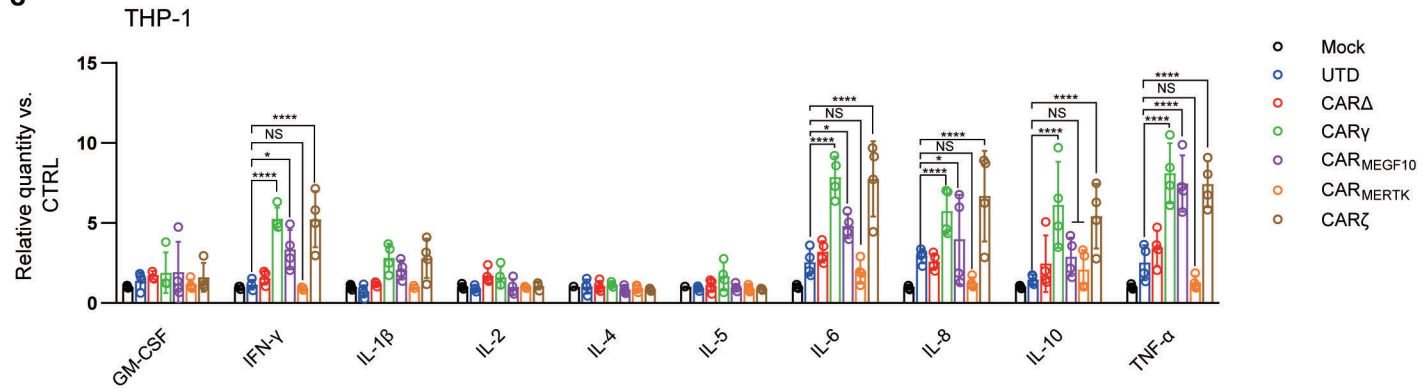

**Figure 3**

**a**

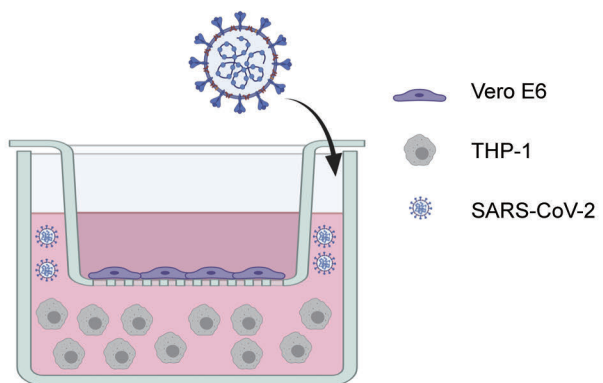

**b**

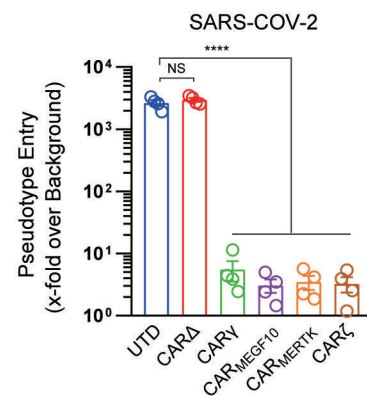

Source: https://www.biorxiv.org/content/10.1101/2020.07.26.222208v2.full.pdf
